# Supplementary material for: Modulation of Spheroid Forming Capacity and TRAIL Sensitivity by KLF4 and Nanog in Gastric Cancer Cells
Source: MDPI journal article supplement (doi:10.3390/cimb45010018), 2022-12-30
Supplement: s1 [file s1]

Supplemental Figure S1. Expression of KLF4 in SNU-601 and SNU-638 treated with cisplatin or TRAIL for seven days.

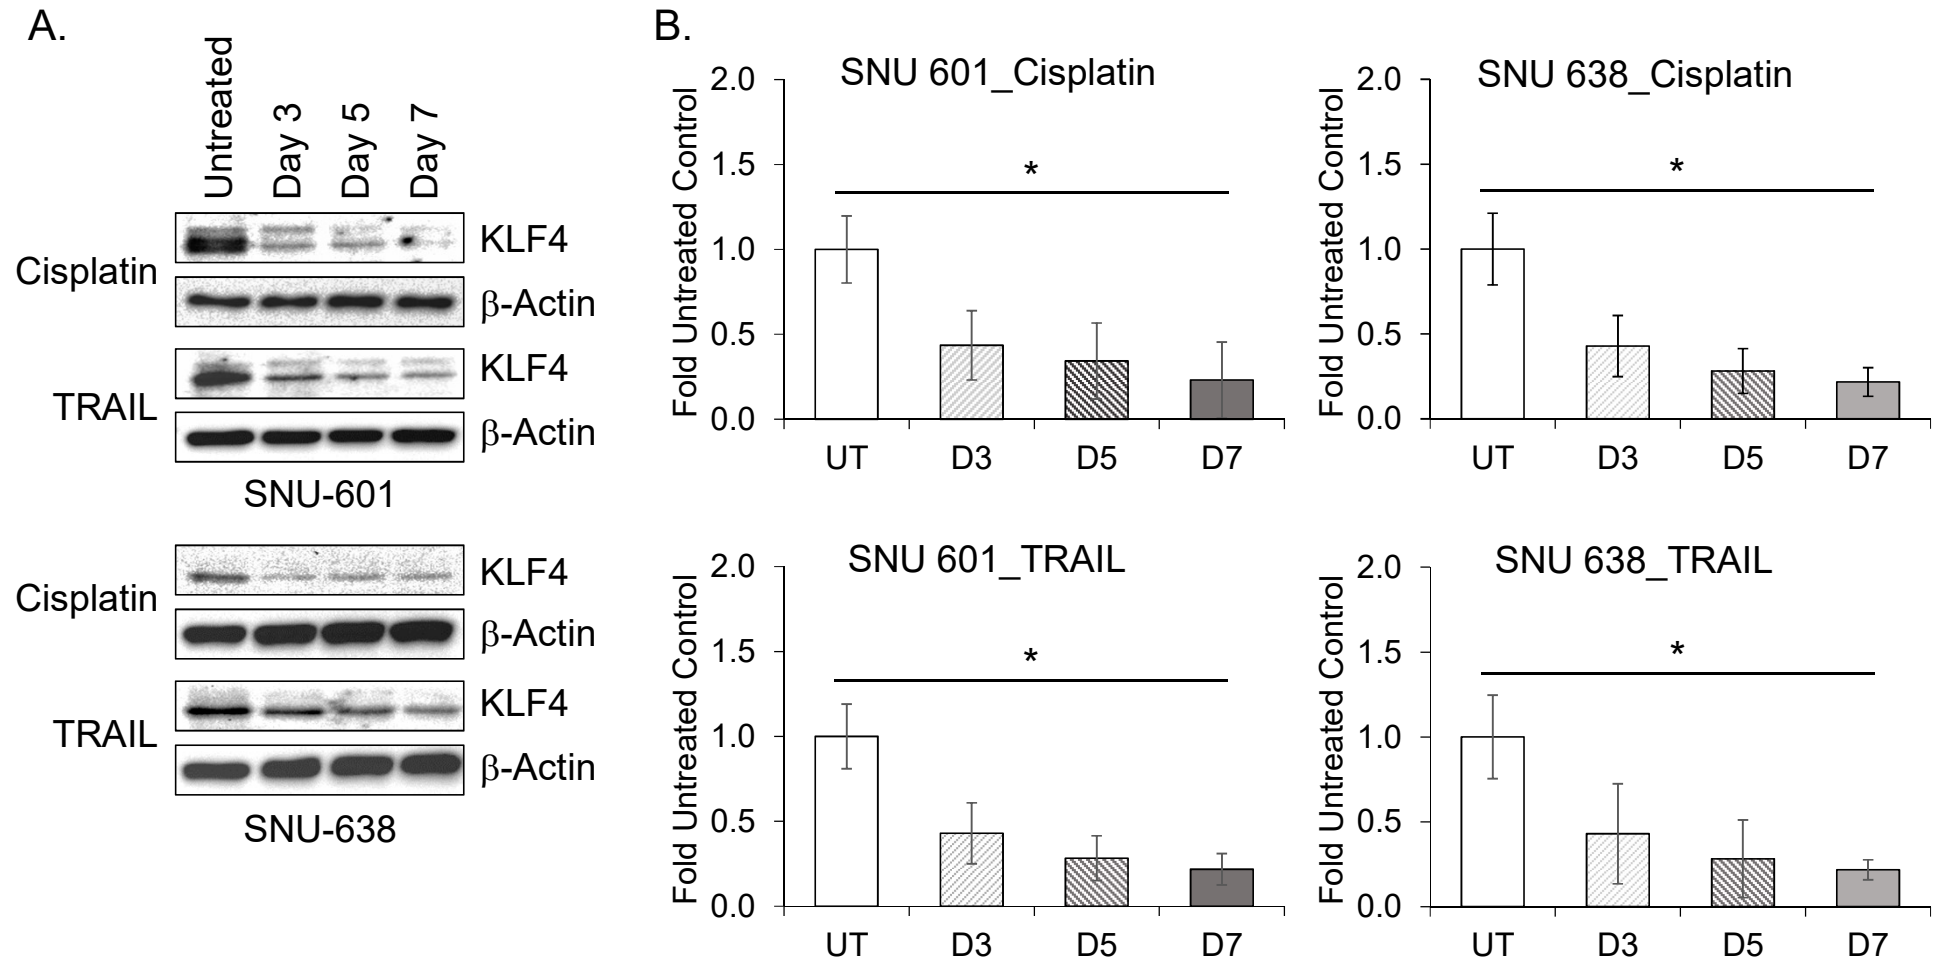

**A.** KLF4 expression in SNU-601 and SNU-638 treated with cisplatin (0.5  $\mu\text{g/ml}$ ) or TRAIL (50  $\text{ng/ml}$ ) for indicated period were examined by western blotting. **B.** Quantified results were normalized against  $\beta$ -Actin level and fold increase over untreated control is shown in mean  $\pm$  SD of three independent experiments. \* represents  $p < 0.05$ .

Supplemental Figure S2. Modulation of TRAIL response by overexpression of KLF4 in SNU-484, SNU-638 and SNU-668

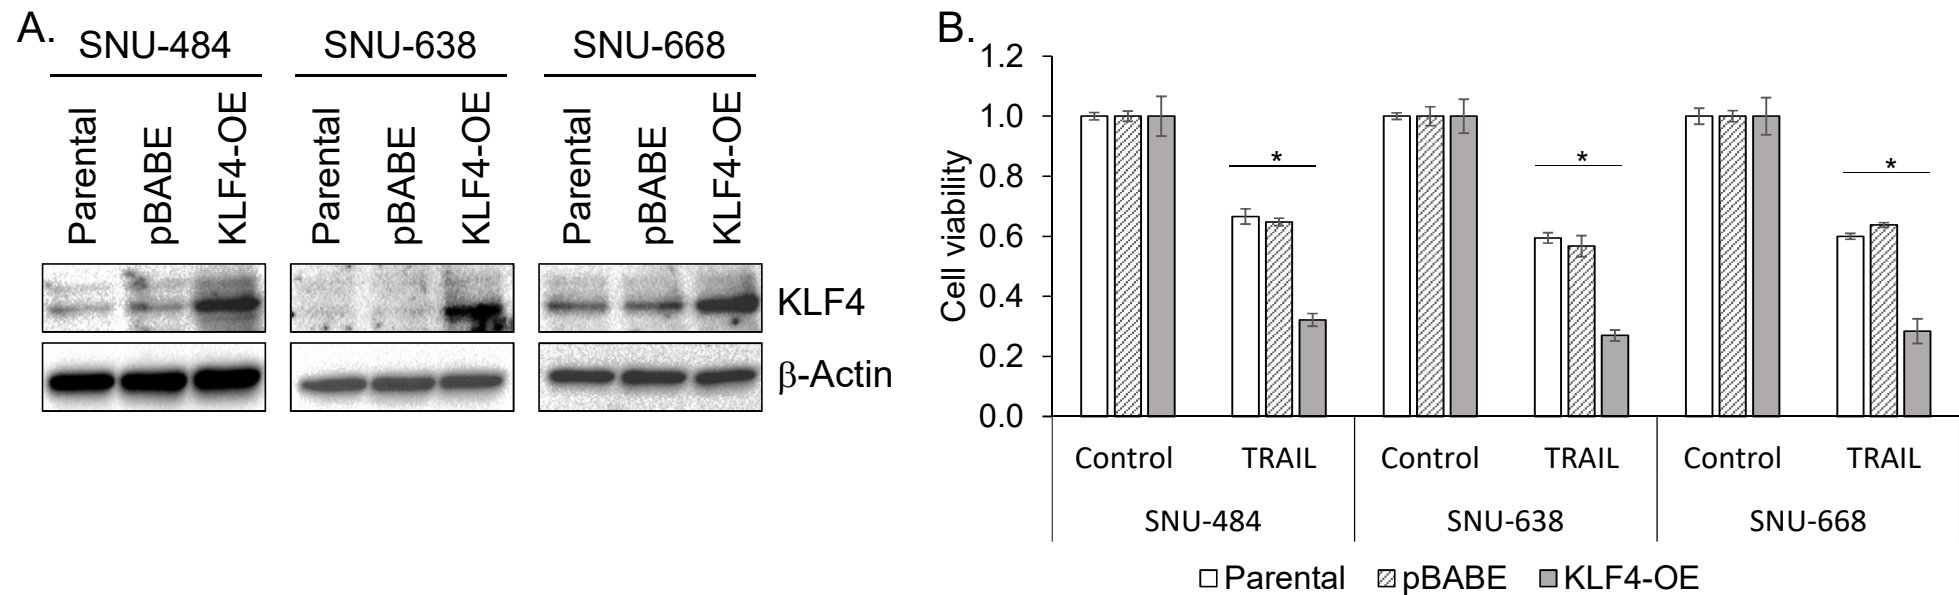

**A.** Overexpression of KLF4 by retroviral transduction of KLF4 cDNA (KLF-OE) in SNU-484, SNU-638 and SNU-668 was verified by western blotting. **B.** Cell viability of the KLF4-overexpressing cells treated with cisplatin (0.5  $\mu$ g/ml) or TRAIL (50 ng/ml) for three days was measured by MTT assay. Data shown are relative viability normalized against untreated parental cells in mean  $\pm$  SD of three independent experiments. \* represents  $p < 0.05$ .
